# Supplementary material
Source: PubMed Central journal article supplement (PMC7736164)
Supplement: NIHMS1596714-supplement-1.pdf [file NIHMS1596714-supplement-1.pdf]

Online Appendix 1  
Risk of bias summary

|                                                                                                                                                                                                                                                                                                                     | Random sequence generation<br>(selection bias) | Allocation concealment<br>(selection bias) | Blinding of participants and<br>personnel (performance bias) | Blinding of primary outcome<br>measure(s) (detection bias) | Incomplete outcome data<br>(attrition bias) | Selective reporting<br>(reporting bias) |
|---------------------------------------------------------------------------------------------------------------------------------------------------------------------------------------------------------------------------------------------------------------------------------------------------------------------|------------------------------------------------|--------------------------------------------|--------------------------------------------------------------|------------------------------------------------------------|---------------------------------------------|-----------------------------------------|
| Danforth et al., (2018)                                                                                                                                                                                                                                                                                             | ?                                              | ?                                          | -                                                            | +                                                          | +                                           | +                                       |
| Gasser et al., (2014)                                                                                                                                                                                                                                                                                               | ?                                              | +                                          | -                                                            | -                                                          | +                                           | +                                       |
| Griffiths et al., (2016)                                                                                                                                                                                                                                                                                            | +                                              | +                                          | +                                                            | +                                                          | +                                           | +                                       |
| Mithoefer et al., (2011)                                                                                                                                                                                                                                                                                            | ?                                              | +                                          | -                                                            | -                                                          | +                                           | +                                       |
| Mithoefer et al., (2018)                                                                                                                                                                                                                                                                                            | ?                                              | +                                          | +                                                            | +                                                          | +                                           | +                                       |
| Oehen et al., (2013)                                                                                                                                                                                                                                                                                                | +                                              | +                                          | -                                                            | +                                                          | +                                           | +                                       |
| Ot'alora et al., (2018)                                                                                                                                                                                                                                                                                             | +                                              | +                                          | +                                                            | +                                                          | +                                           | +                                       |
| Palhano-Fontes et al., (2019)                                                                                                                                                                                                                                                                                       | ?                                              | ?                                          | +                                                            | +                                                          | +                                           | +                                       |
| Ross et al., (2016)                                                                                                                                                                                                                                                                                                 | +                                              | +                                          | -                                                            | +                                                          | +                                           | +                                       |
|  Low risk of bias  Unclear risk of bias  High risk of bias |                                                |                                            |                                                              |                                                            |                                             |                                         |
